# Supplementary material for: Two-dimensional solid-phase crystallization toward centimeter-scale monocrystalline layered MoTe2via two-step annealing
Source: Royal Society of Chemistry journal article supplement (doi:10.1039/d1tc03123f), 2021-01-01
Supplement: d1tc03123f1.pdf [file d1tc03123f1.pdf]

## Supporting Information for

# Two-Dimensional Solid-Phase Crystallization toward Centimeter-Scale Monocrystalline Layered MoTe<sub>2</sub> via Two-Step Annealing

*Chih-Pin Lin,<sup>a</sup> Hao-Hua Hsu,<sup>a</sup> Jyun-Hong Huang,<sup>a</sup> Yu-Wei Kang,<sup>a</sup> Chien-Ting Wu,<sup>b</sup>*

*Yao-Jen Lee,<sup>b</sup> Chun-Cheng Cheng,<sup>c</sup> Yann-Wen Lan,<sup>d</sup> Wen-Hao Chang,<sup>e</sup>*

*Lain-Jong Li,<sup>f</sup> and Tuo-Hung Hou<sup>\*a</sup>*

<sup>a</sup>Department of Electronics Engineering and Institute of Electronics, National Yang Ming Chiao Tung University, Hsinchu 300, Taiwan

<sup>b</sup>Taiwan Semiconductor Research Institute, Hsinchu 300, Taiwan

<sup>c</sup>Advanced Technology Research Center, AU Optronics Corporation, Hsinchu 300, Taiwan

<sup>d</sup>Department of Physics, National Taiwan Normal University, Taipei 116, Taiwan

<sup>e</sup>Department of Electrophysics, National Yang Ming Chiao Tung University, Hsinchu 300, Taiwan

<sup>f</sup>Department of Mechanical Engineering, The University of Hong Kong, Pokfulam, Hong Kong SAR, China

\*Electronic mail: thhou@mail.nctu.edu.tw

## S1. 2H-MoTe<sub>2</sub> formation by Using Different Sputtering Time of MoTe<sub>2</sub>

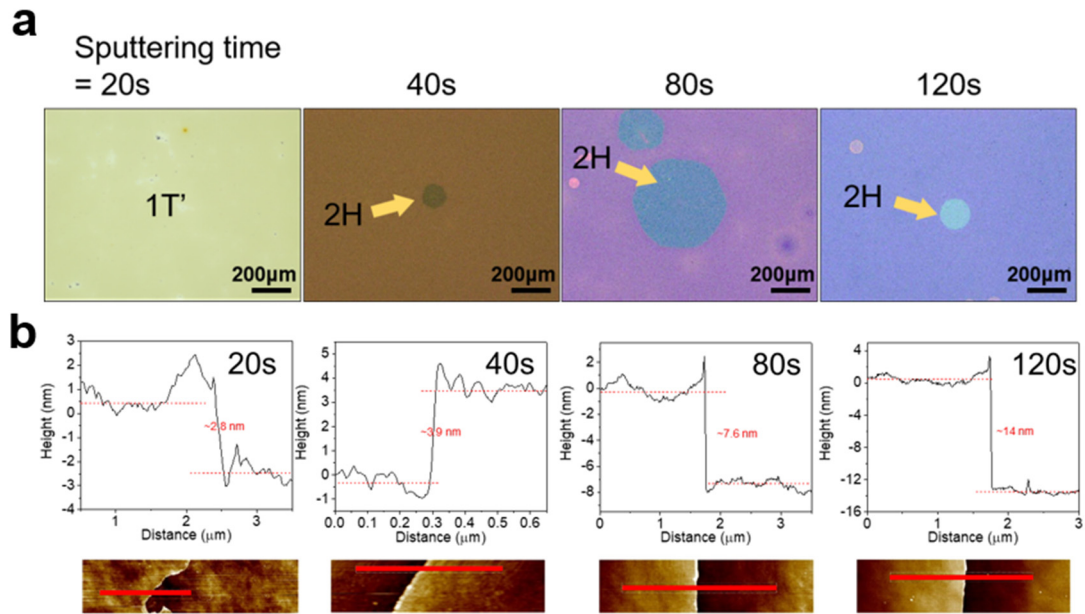

**Fig. S1** Optical image of MoTe<sub>2</sub> with various sputtering time at  $T_a = 700$  °C for 5 min in RTA. The thickness of MoTe<sub>2</sub> film is easily controlled by tuning the sputtering time,<sup>1,2</sup> which can be seen also from (a) the apparent color contrast in the optical images and (b) AFM results of as-sputtered MoTe<sub>2</sub>. The sputtering time of 40s is selected in our study to obtain a thinner thickness.

## S2. Temperature-Dependent 2H-MoTe<sub>2</sub> Nucleation in RTA

**Table S2** Phase of MoTe<sub>2</sub> as a function of  $T_a$  in RTA with  $t_a=1$  min.

| Temperature (°C) | 500      | 650 | 700    | 750    | 800    | 850    | 900 |
|------------------|----------|-----|--------|--------|--------|--------|-----|
| Phase            | $\alpha$ | 1T' | 1T'/2H | 1T'/2H | 1T'/2H | 1T'/2H | 1T' |

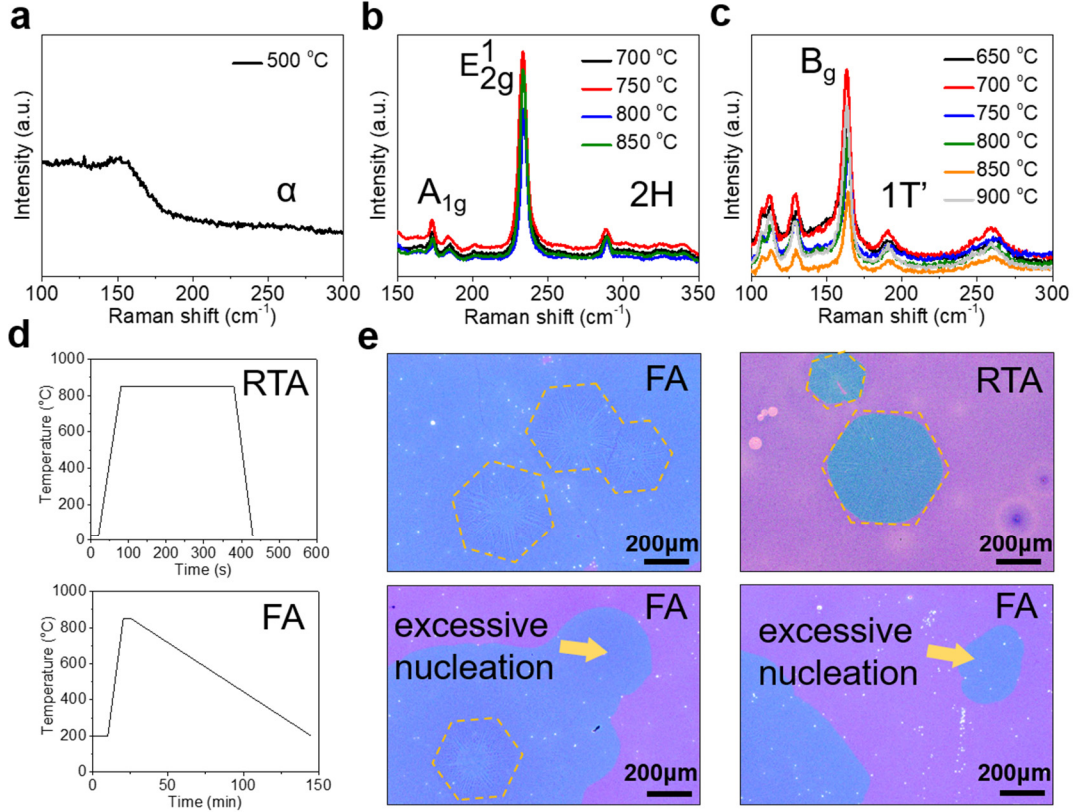

**Fig. S2** (a-c) Raman spectra of  $\alpha$ -, 2H- and 1T'-phase at various  $T_a$  in RTA. (d) Annealing temperature profiles of RTA and FA. The  $r_{ramp}$  and  $t_{cool}$  of RTA (FA) are 55 °C/s ( $\sim$ 1 °C/s) and 20s ( $\sim$ 2 hr), respectively. Both  $t_a$  and  $T_a$  are 5 min and 850 °C. (e) Optical image of hexagonal 2H MoTe<sub>2</sub> annealed at 850 °C for 5 min in FA and RTA. Excessive nucleation could be observed in FA-annealed samples due to the slow heating and cooling processes.

### S3. Effect of $r_{ramp}$ and $t_{cool}$ on the Synthesis of 2H-MoTe<sub>2</sub> in RTA

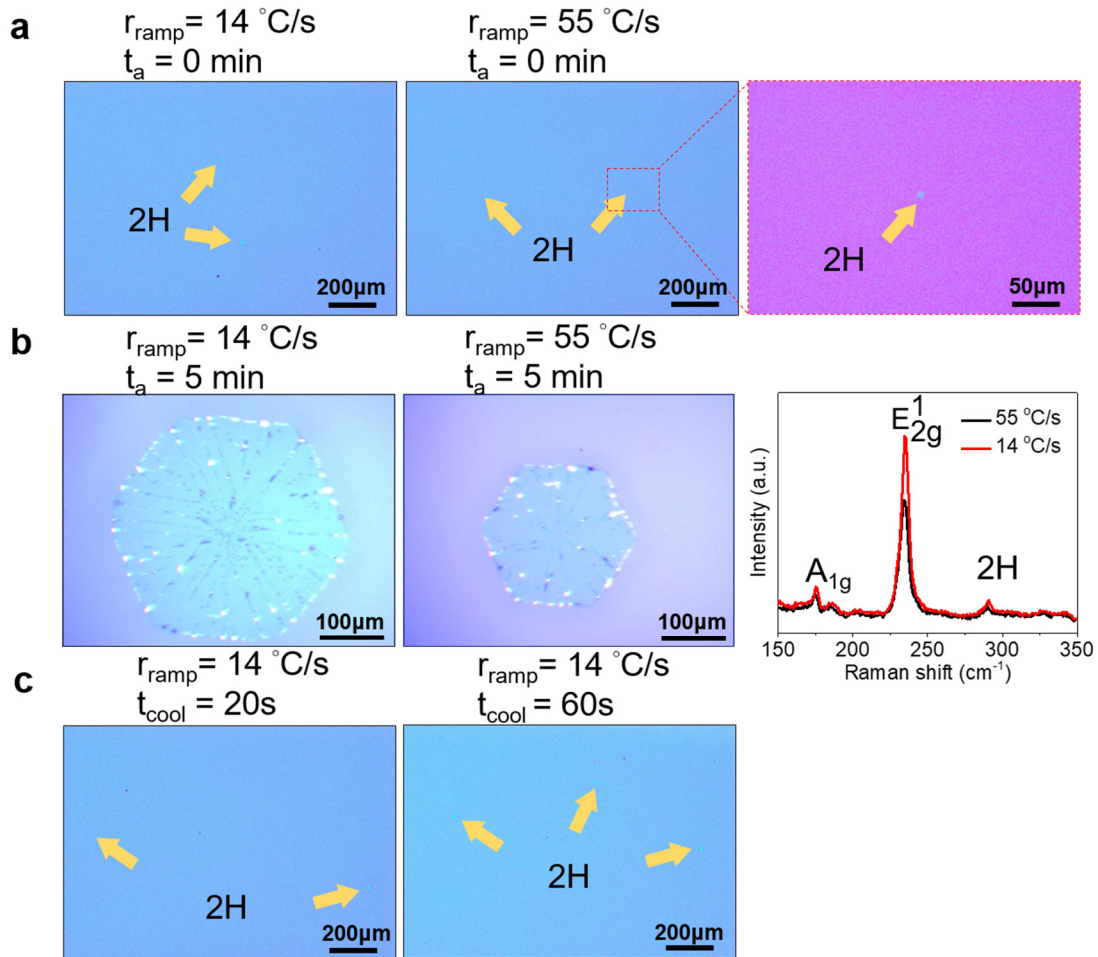

**Fig. S3** Effect of  $r_{ramp}$  on (a) 2H-phase nucleation and (b) domain morphology. (c) Effect of  $t_{cool}$  on 2H-phase nucleation. In the range we chose, both parameters in RTA show insignificant effects.

#### S4. Effect of $t_a$ on the Domain Morphology

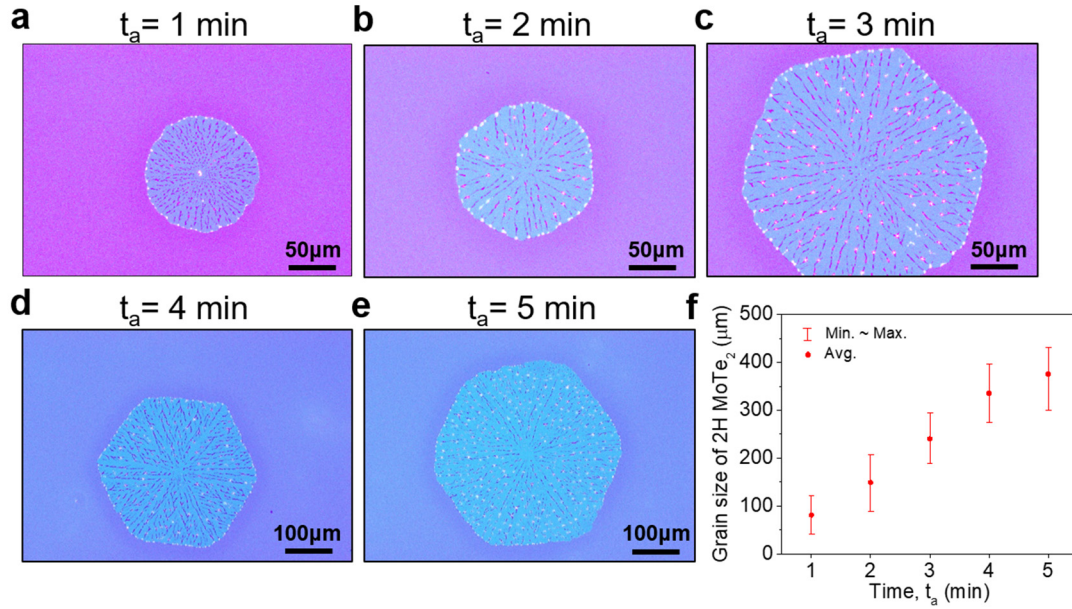

**Fig. S4** Time evolution ( $t_a = 1$  to 5 min) of domain (a-e) morphology and (f) size of 2H-MoTe<sub>2</sub>. The 2H-MoTe<sub>2</sub> domain shows a shape transition from round to hexagonal as  $t_a$  increases, and the grain size monotonously increases over time.

## S5. Crystallographic Orientation of Hexagonal 2H-MoTe<sub>2</sub> Domain

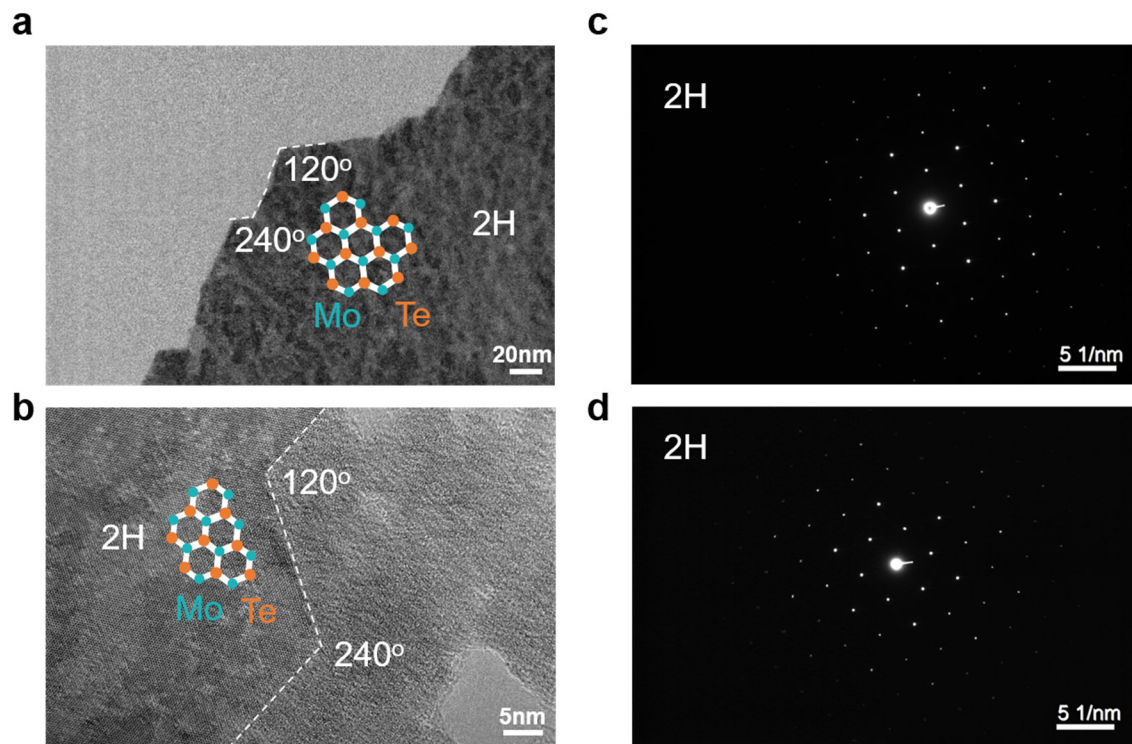

**Fig. S5** (a-b) HRTEM image at the boundary of hexagonal 2H-MoTe<sub>2</sub> domain and (c-d) its corresponding SAED patterns. Most edge regions show an angle of 120° or 240°, an integer multiple of the angle difference between two adjacent ZZ planes.<sup>3,4</sup> Therefore, we conclude that the hexagonal 2H domain is dominated by the ZZ edges.

## S6. Crystallographic Orientation Measured by EBSD

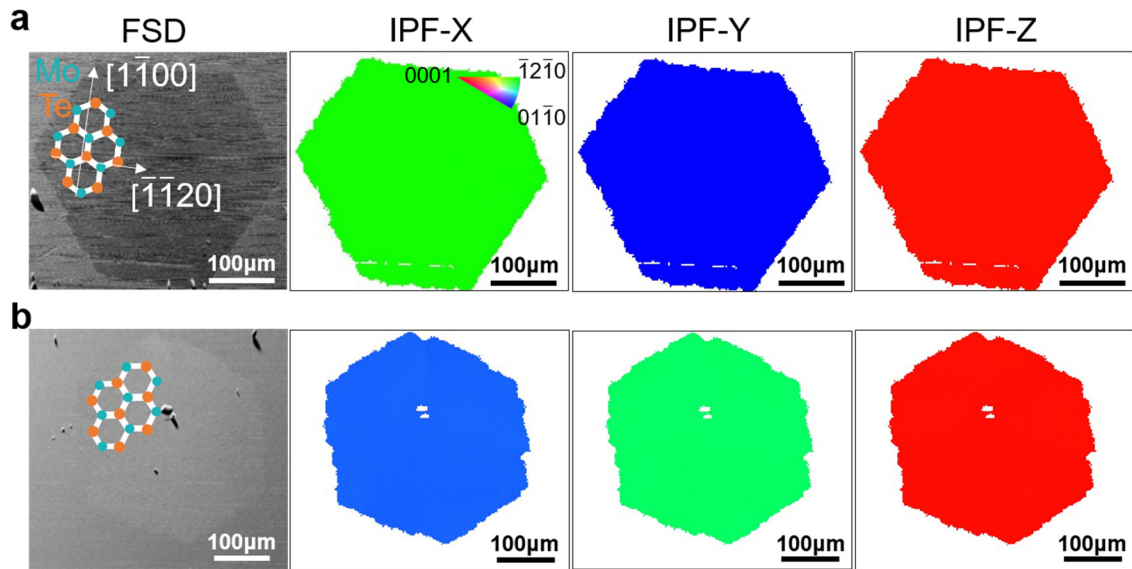

**Fig. S6** EBSD mapping of two hexagonal 2H-MoTe<sub>2</sub>, confirming the crystallographic orientation and monocrystallinity of 2H-MoTe<sub>2</sub> domains. All three IPF maps show uniform color distributions, indicating the monocrystalline nature. The color maps of IPF-X and IPF-Y reveal that the crystallographic orientations of hexagonal 2H-MoTe<sub>2</sub> are roughly aligned along with the  $\langle \bar{1}2\bar{1}0 \rangle$ - and  $\langle 01\bar{1}0 \rangle$ -direction corresponding to the x- and y-axis, respectively. The edge is dominated by the ZZ orientation. The IPF-Z also confirmed that the out-of-plane orientation of 2H-MoTe<sub>2</sub> is parallel to the substrate in a 2D layered structure.

### S7. 2H-MoTe<sub>2</sub> Nucleation Sites after RTA treatment

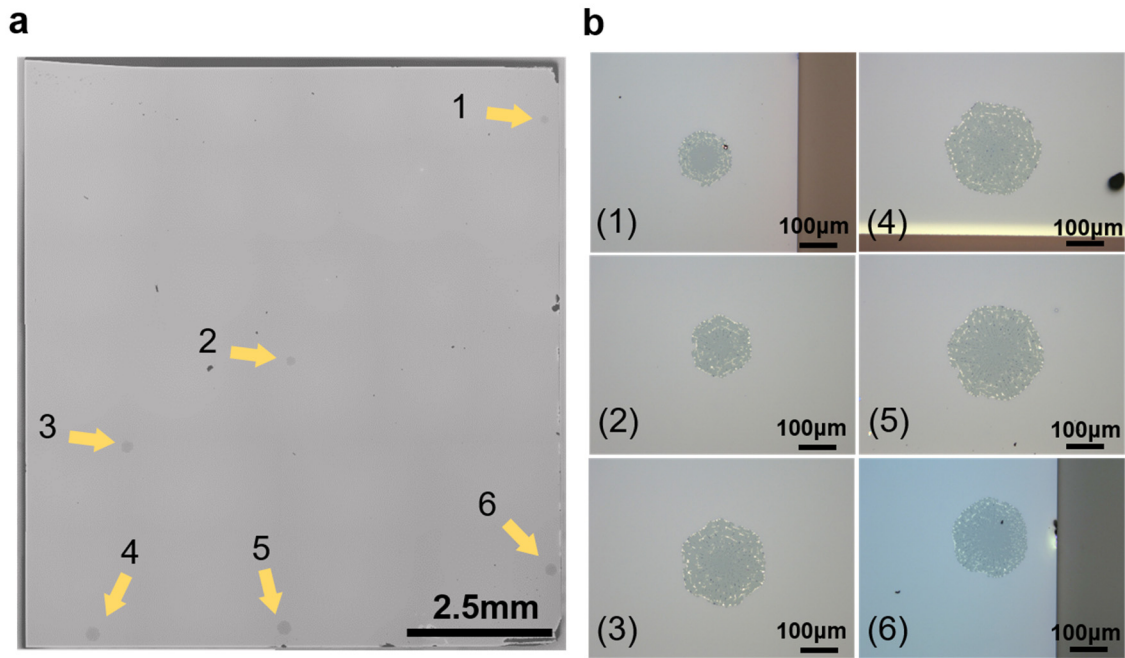

**Fig. S7** Optical image showing the distribution of 2H-MoTe<sub>2</sub> nucleation sites in  $\alpha$ -MoTe<sub>2</sub> on a SiO<sub>2</sub> substrate ( $\sim 1 \text{ cm}^2$ ). The RTA condition was 850 °C for 5 min.  $r_n$  is estimated to be  $1.2 \text{ min}^{-1} \text{ cm}^{-2}$ .



### S8. Estimation of Final Grain Size by JMAK Equation

According to ref. 5, the crystalline fraction ( $f$ ) of 2D material as a function of time and temperature could be estimated using the Johnson-Mehl-Avrami-Kolmogorov equation:

$$f=1-\exp[-Kt^n],$$

where  $K=\frac{\pi}{3}r_n v_g^2$ ,  $n= 3$  in the 2D case. The crystallization time  $\tau$  is defined by  $K\tau \sim 1$ , i.e.

$\tau \sim \frac{1}{(r_n v_g^2)^{1/3}}$ , when the fracture  $f$  reaches unity for a completely crystallized film. Therefore,

the final grain size could be estimated as  $v_g \tau \sim (v_g/r_n)^{1/3}$ . From our experimental results, the mean  $r_n$  and  $v_g$  of 2H-MoTe<sub>2</sub> annealed by RTA are  $1.2 \text{ min}^{-1}\text{cm}^{-2}$  and  $0.4 \text{ }\mu\text{m/s}$  at  $850 \text{ }^\circ\text{C}$ , respectively. Thus, the final grain size under prolonged RTA treatment is approximately 2.5 nm.

## S9. Shape Evolution Using Two Subsequent RTA Treatments

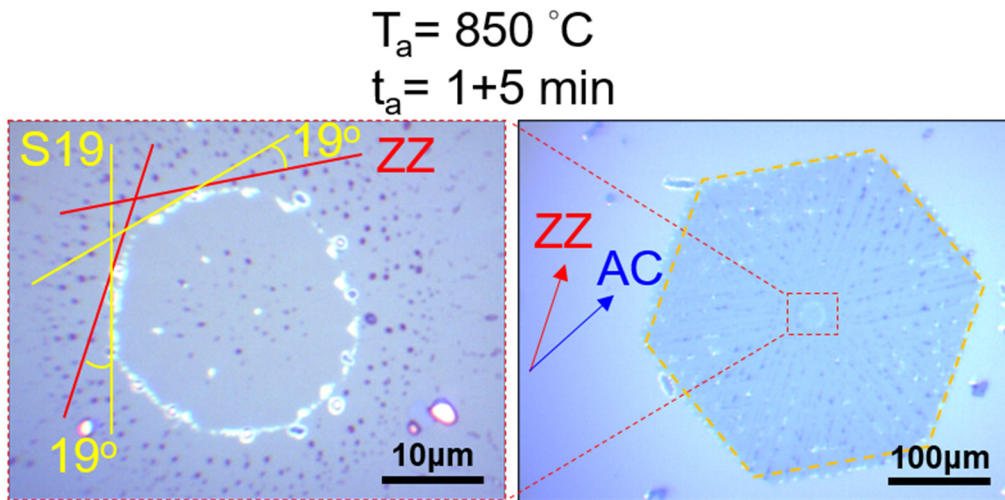

**Fig.S8** Shape evolution characterized using two subsequent RTA annealing with  $t_a = 1$  min and 5 min each. The first short-duration RTA produced circular 2H-MoTe<sub>2</sub> domains where the edge structure was dominated by S19 (slanted edges with an  $\sim 19^\circ$  angle from the ZZ edge).<sup>6</sup> Such edges were replaced by the ZZ edges after the long-duration RTA for 5 min, and the domain shape was transformed from circular to hexagonal.

## S10. Nano-crack Formation in 2H-MoTe<sub>2</sub> under High-Temperature SPC

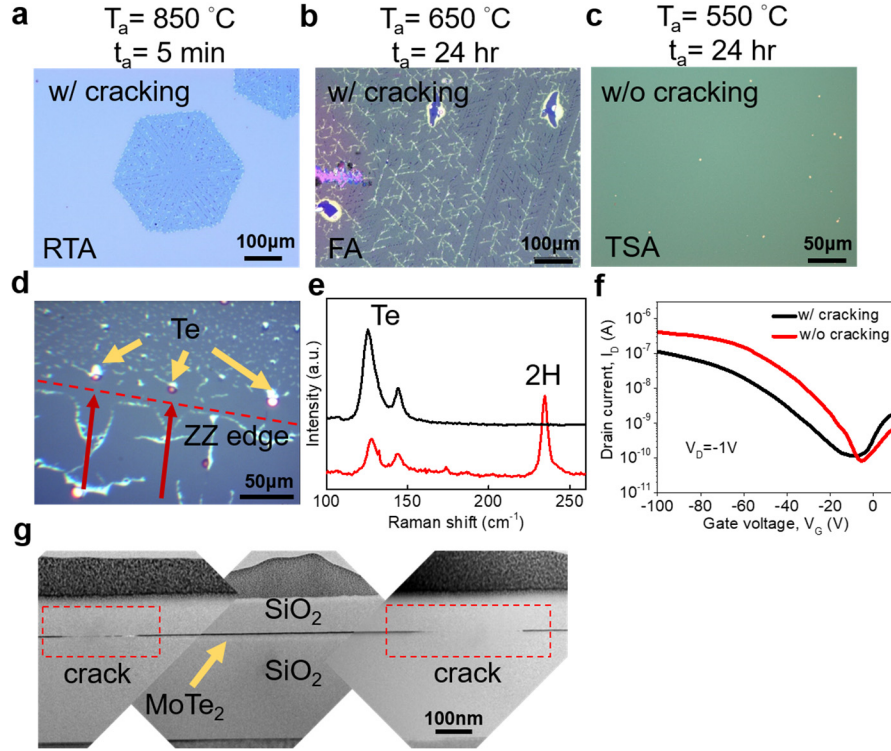

**Fig. S9** (a-c) Optical image showing the surface morphology of 2H-MoTe<sub>2</sub> annealed by RTA, FA, and TSA. The dendrite-like nano-cracks with a radical pattern were found in 2H-MoTe<sub>2</sub> at high  $T_a$  regardless of the heating instrument (RTA or FA). (d) Te segregation at the boundary of 2H and 1T' phases. (e) Raman spectroscopy of vibrational modes at  $\sim 128$  and  $145$   $\text{cm}^{-1}$  confirms the Te segregation.<sup>7</sup> (f) Transfer characteristics ( $I_D$ - $V_G$ ) of MoTe<sub>2</sub> back-gated transistor with and without cracking. The device channel length/width ( $L/W$ ) is  $10\mu\text{m}/24\mu\text{m}$ . (g) Cross-sectional HRTEM image showing that the nano-crack is due to the local discontinuity of 2H-MoTe<sub>2</sub> (the red-dash frame region). The formation of nano-cracks could be suppressed at lower  $T_a$ . One plausible explanation of forming nano-cracks is the significant stress induced by the migration of Te clusters at high temperatures during 2H-MoTe<sub>2</sub> growth, which might be large enough to rupture the film. In MoS<sub>2</sub>, a similar stress-induced nano-scratch was observed by applying force using the tip in the atomic force microscope (AFM).<sup>8</sup> The nano-scratches showed preferable breaking along the ZZ direction since the fracture strength of MoS<sub>2</sub> along ZZ is lower than AC. Similarly, the rupture of MoTe<sub>2</sub> tends to extend outward along the ZZ direction.

### S11. Variation of $r_n$ at Low $T_a$

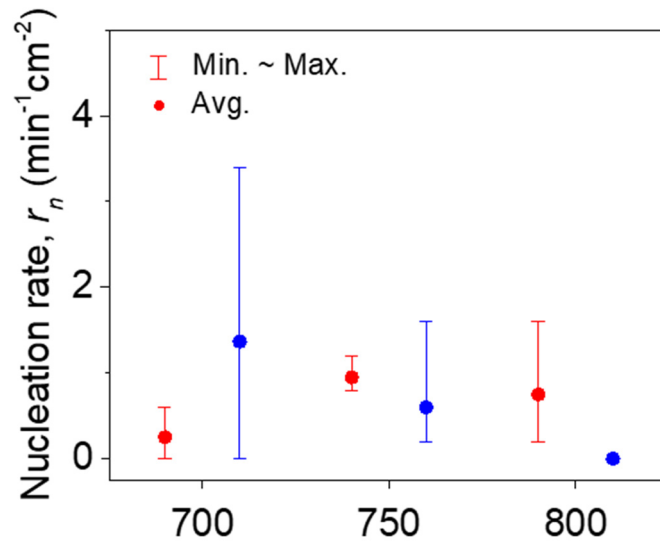

**Fig. S10**  $r_n$  as a function of  $T_a$  in RTA. The statistics of red and blue data are from two different experiments with the same condition. Both experiments show the trend of reduced  $r_n$  at higher  $T_a$ . By contrast,  $r_n$  at low  $T_a$  shows large discrepancies between these two experiments. The exact reason is still under investigation.

## S12. Monocrystalline 2H-MoTe<sub>2</sub> with Different Domain Morphologies

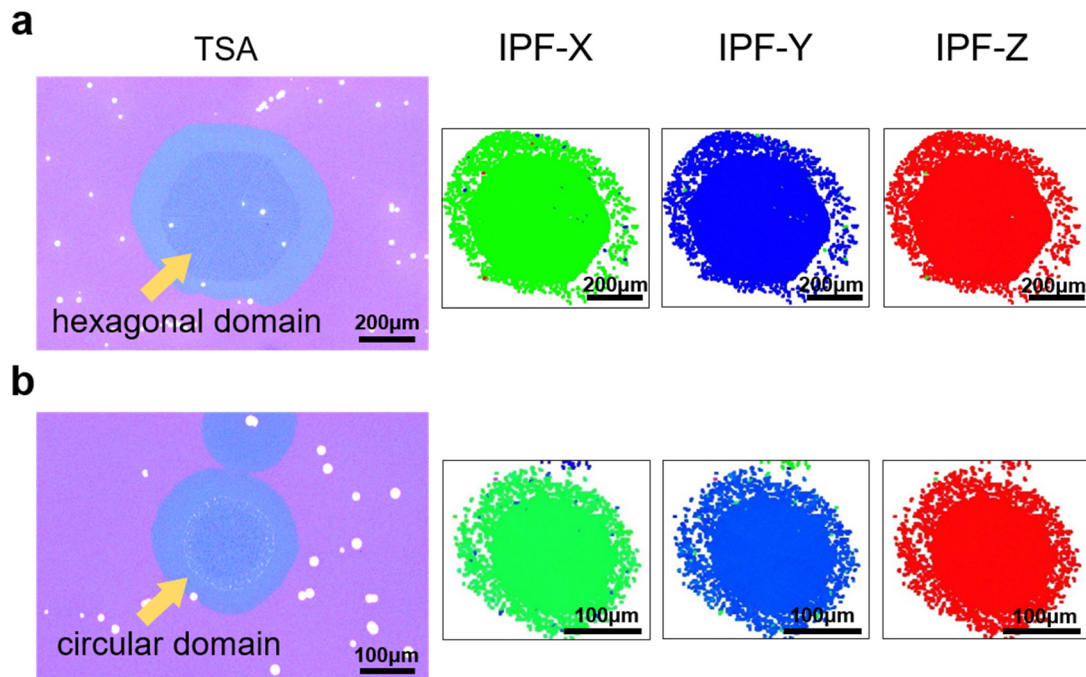

**Fig. S11** Optical image and EBSD mapping of 2H-MoTe<sub>2</sub> after TSA by using (a) hexagonal and (b) circular domains as seeds. The second-step FA continued enlarging monocrystalline grains outward from the seed regions.

### S13. 2H-MoTe<sub>2</sub> Transistors with ZZ- or AC Channel Orientation

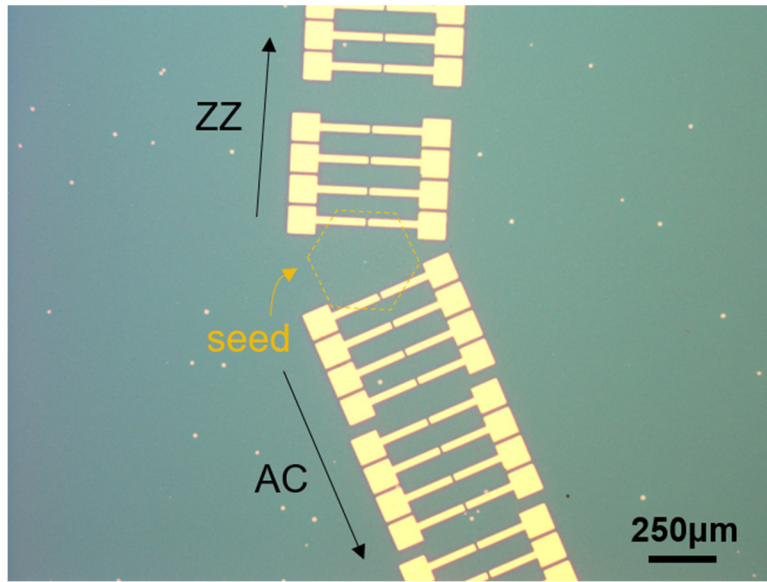

**Fig. S12** Optical image of 2H-MoTe<sub>2</sub> transistors with ZZ and AC channel orientation in a large area.

## References

1. J. -H. Huang, K. -Y. Deng, P. -S. Liu, C. -T. Wu, C. -T. Chou, W. -H. Chang, Y. -J. Lee and T. -H. Hou, *Adv. Mater. Interfaces* 2017, **4**, 1700157.
2. J. -H. Huang, H. -H. Hsu, D. Wang, W. -T. Lin, C. -C. Cheng, Y. -J. Lee and T. -H. Hou, *Sci. Rep.* 2019, **9**, 8810.
3. Q. Yu, L. A. Jauregui, W. Wu, R. Colby, J. Tian, Z. Su, H. Cao, Z. Liu, D. Pandey, D. Wei, T. F. Chung, P. Peng, N. P. Guisinger, E. A. Stach, J. Bao, S. -S. Pei and Y. P. Chen, *Nat. Mater.* 2011, **10**, 443-449.
4. J. H. Sung, H. Heo, S. Si, Y. H. Kim, H. R. Noh, K. Song, J. Kim, C. -S. Lee, S. -Y. Seo, D. -H. Kim, H. K. Kim, H. W. Yeom, T. -H. Kim, S. -Y. Choi, J. S. Kim and M. -H. Jo, *Nat. Nanotechnol.* 2017, **12**, 1064-1070.
5. X. Xu, S. Chen, S. Liu, X. Cheng, W. Xu, P. Li, Y. Wan, S. Yang, W. Gong, K. Yuan, P. Gao, Y. Ye and L. J. Dai, *Am. Chem. Soc.* 2019, **141**, 2128-2134.
6. T. Ma, W. Ren, X. Zhang, Z. Liu, Y. Gao, L. -C. Yin, X. -L. Ma, F. Ding and H. -M Cheng, *PNAS* 2013, **110**, 20386-20391.
7. S. Khatun, A. Banerjee and A. J. Pal, *Nanoscale* 2019, **11**, 3591-3598.
8. S. Ye, K. Xu, L. Lei, S. Hussain, F. Pang, X. Liu, Z. Zheng, W. Ji, X. Shi and R. Xu, *Mater. Res. Express.* 2019, **6**, 025048.
